# Supplementary material for: Metabolomic Profiles in Childhood and Adolescence Are Associated with Fetal Overnutrition
Source: MDPI journal article supplement (doi:10.3390/metabo12030265), 2022-03-19
Supplement: s1 [file s1]

## **Supplementary Material**

**Title:** Metabolomic profiles in childhood and adolescence associated with fetal overnutrition

**Authors:** Ellen C. Francis; Katerina Kechris; Catherine C. Cohen; Gregory Michelotti; Dana Dabelea; Wei Perng

**Supplementary Table S1: Longitudinal associations ( $\beta$  [95% CI]) of fetal overnutrition (obesity and GDM, obesity only, and GDM only) with top loading metabolites across 6 years of follow-up among 444 youth in the EPOCH cohort.**

| Factor loading by visit    |            | Compound                                             | Superclass   | Subclass                                    | OB + GDM            | OB + GDM            | OB only             |
|----------------------------|------------|------------------------------------------------------|--------------|---------------------------------------------|---------------------|---------------------|---------------------|
| childhood                  | adolescent |                                                      |              |                                             | vs.<br>GDM only     | vs.<br>OB only      | vs.<br>GDM only     |
| Sphingomyelin-mannose      |            |                                                      |              |                                             |                     |                     |                     |
| 0.61                       | 0.58       | Sphingomyelin (d18:2/14:0, d18:1/14:1)               | Lipid        | Sphingomyelins                              | 0.03 (-0.03, 0.09)  | 0.01 (-0.06, 0.07)  | 0.03 (-0.01, 0.06)  |
| 0.59                       | 0.64       | Sphingomyelin (d18:0/18:0, d19:0/17:0)               | Lipid        | Dihydrosphingomyelins                       | 0.03 (-0.07, 0.13)  | 0.00 (-0.11, 0.10)  | 0.03 (-0.04, 0.10)  |
| 0.54                       | 0.59       | Mannose                                              | Carbohydrate | Fructose, Mannose and Galactose Metabolism  | 0.04 (-0.02, 0.10)  | -0.01 (-0.07, 0.04) | 0.06 (0.00, 0.11) * |
| 0.52                       | 0.58       | Homoarginine                                         | Amino Acid   | Urea cycle; Arginine and Proline Metabolism | 0.07 (0.02, 0.11) * | 0.04 (-0.01, 0.09)  | 0.03 (-0.01, 0.07)  |
| 0.45                       | 0.50       | N1-methyladenosine                                   | Nucleotide   | Purine Metabolism, Adenine containing       | 0.01 (-0.05, 0.07)  | 0.01 (-0.05, 0.07)  | 0.00 (-0.04, 0.05)  |
| Skeletal muscle metabolism |            |                                                      |              |                                             |                     |                     |                     |
| 0.63                       | 0.76       | Alpha-hydroxyisocaproate                             | Amino Acid   | Leucine, Isoleucine and Valine Metabolism   | -0.01 (-0.05, 0.03) | 0.02 (-0.02, 0.06)  | -0.03 (-0.07, 0.01) |
| 0.49                       | 0.62       | 2-hydroxy-3-methylvalerate                           | Amino Acid   | Leucine, Isoleucine and Valine Metabolism   | 0.01 (-0.04, 0.06)  | 0.03 (-0.02, 0.09)  | -0.02 (-0.07, 0.02) |
| 0.40                       | 0.51       | Malate                                               | Energy       | TCA Cycle                                   | 0.00 (-0.05, 0.05)  | 0.02 (-0.03, 0.07)  | -0.02 (-0.06, 0.02) |
| 0.40                       | 0.51       | Citrate                                              | Energy       | TCA Cycle                                   | 0.00 (-0.05, 0.04)  | 0.02 (-0.03, 0.06)  | -0.02 (-0.06, 0.02) |
| 0.40                       | <.40       | Urate                                                | Nucleotide   | Purine Metabolism, (Hypo)Xanthine/Inosine   | 0.04 (0.00, 0.07) * | 0.04 (0.00, 0.07) * | 0.00 (-0.03, 0.03)  |
| <.40                       | 0.41       | 7-alpha-hydroxy-3-oxo-4-cholestenoate (7-Hoca)       | Lipid        | Sterol                                      | 0.01 (-0.03, 0.06)  | 0.05 (0.00, 0.09) * | -0.03 (-0.07, 0.00) |
| CMPF                       |            |                                                      |              |                                             |                     |                     |                     |
| 0.74                       | 0.91       | 3-carboxy-4-methyl-5-propyl-2-furanpropanoate (CMPF) | Lipid        | Fatty Acid, Dicarboxylate                   | 0.27 (0.06, 0.48) * | 0.07 (-0.15, 0.29)  | 0.20 (0.05, 0.34) * |
| 0.71                       | 0.90       | Hydroxy-CMPF                                         | Lipid        | Fatty Acid, Dicarboxylate                   | 0.17 (-0.03, 0.37)  | -0.01 (-0.21, 0.20) | 0.18 (0.03, 0.33) * |

Adjusted for maternal smoking in pregnancy, child sex, race, and age at visit.

Abbreviations: CMPF, 3-carboxy-4-methyl-5-propyl-2-furanpropanoic acid; GDM, Gestational Diabetes Mellitus OB, prepregnancy obesity

\* P<.05

**Supplementary Table S2: Adjusted longitudinal associations ( $\beta$  [95% CI]) of fetal overnutrition (obesity and GDM, obesity only, and GDM only) with metabolite factor scores across 6 years of follow-up among 444 youth in the EPOCH cohort.**

| Factors                                          | OB + GDM<br>vs.<br>GDM only | OB + GDM<br>vs.<br>OB only | OB only<br>vs.<br>GDM only |
|--------------------------------------------------|-----------------------------|----------------------------|----------------------------|
|                                                  |                             |                            |                            |
| <b>Model A (Tanner stage at each visit)</b>      |                             |                            |                            |
| $\gamma$ -glutamyl                               | -0.21 (-0.52, 0.10)         | -0.18 (-0.51, 0.14)        | -0.03 (-0.29, 0.23)        |
| Sphingomyelin-mannose                            | 0.31 (-0.04, 0.65)          | 0.00 (-0.36, 0.37)         | 0.30 (0.04, 0.56) *        |
| Skeletal muscle metabolism                       | 0.35 (0.07, 0.63) *         | 0.46 (0.21, 0.72) *        | -0.11 (-0.35, 0.12)        |
| CMPF                                             | 0.51 (0.12, 0.90) *         | 0.06 (-0.33, 0.44)         | 0.45 (0.17, 0.73) *        |
| <b>Model B (BMI at each visit)</b>               |                             |                            |                            |
| $\gamma$ -glutamyl                               | -0.18 (-0.48, 0.12)         | -0.14 (-0.44, 0.17)        | -0.05 (-0.31, 0.22)        |
| Sphingomyelin-mannose                            | 0.20 (-0.12, 0.52)          | -0.01 (-0.34, 0.31)        | 0.21 (-0.03, 0.45)         |
| Skeletal muscle metabolism                       | 0.32 (0.06, 0.59) *         | 0.48 (0.24, 0.71) *        | -0.15 (-0.39, 0.08)        |
| CMPF                                             | 0.52 (0.12, 0.91) *         | 0.05 (-0.34, 0.44)         | 0.47 (0.18, 0.75) *        |
| <b>Model C (Kcal at each visit)</b>              |                             |                            |                            |
| $\gamma$ -glutamyl                               | -0.21 (-0.51, 0.10)         | -0.15 (-0.45, 0.16)        | -0.06 (-0.32, 0.20)        |
| Sphingomyelin-mannose                            | 0.31 (-0.03, 0.65)          | -0.03 (-0.40, 0.33)        | 0.34 (0.09, 0.60) *        |
| Skeletal muscle metabolism                       | 0.37 (0.08, 0.65) *         | 0.46 (0.20, 0.72) *        | -0.09 (-0.34, 0.15)        |
| CMPF                                             | 0.53 (0.14, 0.92) *         | 0.07 (-0.33, 0.46)         | 0.46 (0.18, 0.74) *        |
| <b>Model D (physical activity at each visit)</b> |                             |                            |                            |
| $\gamma$ -glutamyl                               | -0.22 (-0.52, 0.09)         | -0.15 (-0.46, 0.17)        | -0.07 (-0.34, 0.19)        |
| Sphingomyelin-mannose                            | 0.37 (0.06, 0.69) *         | 0.02 (-0.31, 0.36)         | 0.35 (0.09, 0.61) *        |
| Skeletal muscle metabolism                       | 0.41 (0.13, 0.69) *         | 0.48 (0.21, 0.74) *        | -0.07 (-0.31, 0.17)        |
| CMPF                                             | 0.54 (0.16, 0.92) *         | 0.09 (-0.29, 0.46)         | 0.45 (0.17, 0.73) *        |
| <b>Model E (birthweight z-score)</b>             |                             |                            |                            |
| $\gamma$ -glutamyl                               | -0.20 (-0.50, 0.10)         | -0.15 (-0.46, 0.15)        | -0.05 (-0.31, 0.21)        |
| Sphingomyelin-mannose                            | 0.29 (-0.05, 0.63)          | -0.03 (-0.39, 0.33)        | 0.32 (0.07, 0.58) *        |
| Skeletal muscle metabolism                       | 0.37 (0.10, 0.65) *         | 0.50 (0.24, 0.75) *        | -0.12 (-0.36, 0.11)        |
| CMPF                                             | 0.50 (0.11, 0.89) *         | 0.05 (-0.35, 0.44)         | 0.45 (0.17, 0.74) *        |

Model A: Adjusted for maternal smoking in pregnancy, child sex, race, and age and Tanner stage at visit.

Model C: Adjusted for maternal smoking in pregnancy, child sex, race, and age and kilocalories at visit.

Model D: Adjusted for maternal smoking in pregnancy, child sex, race, and age and mean physical activity at visit.

Model E: Adjusted for maternal smoking in pregnancy, child sex, race, birthweight-for-gestational-age z-score, and age at visit.

Abbreviations: CMPF, 3-carboxy-4-methyl-5-propyl-2-furanpropanoic acid; GDM, Gestational Diabetes Mellitus OB, prepregnancy obesity

\*  $P < .05$
